# Supplementary material
Source: publisher figshare collection journal article supplement (https://acs.figshare.com/ndownloader/files/3608919)
Supplement: Supplementary file 1 [file 3608919]

# On the inapplicability of electron hopping models for the organic semiconductor Phenyl-C61-butyric Acid Methyl Ester (PCBM)

Fruzsina Gajdos<sup>a</sup>, Harald Oberhofer<sup>b</sup>, Michel Dupuis<sup>c</sup>, Jochen Blumberger<sup>a</sup>

July 29, 2014

<sup>a</sup> *University College London, Department of Physics and Astronomy, London WC1E 6BT, UK.*

<sup>b</sup> *Technical University Munich, Theoretical Chemistry, Lichtenbergstr. 4, D-85747 Garching, Germany.*

<sup>c</sup> *Pacific Northwest National Laboratory, Richland, Washington, United States.* to whom correspondence should

be sent, e-mail: j.blumberger@ucl.ac.uk

## Supporting information (corrected)

# 1 Computational Methods

Geometry optimization of the PCBM molecules in the tc and mc structures were carried out for unit cell dimensions that were fixed to the experimental values.<sup>1</sup>  $a = 13.833 \text{ \AA}$ ,  $b = 15.288 \text{ \AA}$ ,  $c = 19.249 \text{ \AA}$ ,  $\alpha = 80.259^\circ$ ,  $\beta = 78.557^\circ$ ,  $\gamma = 80.406^\circ$  for tc and  $a = 13.756 \text{ \AA}$ ,  $b = 16.634 \text{ \AA}$ ,  $c = 19.077 \text{ \AA}$ ,  $\alpha = 90.000^\circ$ ,  $\beta = 105.289^\circ$ ,  $\gamma = 90.000^\circ$  for mc. The tc structure contains 4 PCBM molecules per unit cell and 4 chlorobenzene solvent molecules and the mc structure 4 PCBM molecules and 2 ortho-dichloro-benzene solvent molecules. The orbitals were expanded in plane waves with a reciprocal space energy cutoff of 90 Ry and the exchange correlation energy was calculated according to Perdew, Burke and Ernzerhof (PBE).<sup>2</sup> Dispersion interactions were accounted for in two ways (i) by dispersion corrected atom-centred Goedecker-Hutter pseudo-potentials,<sup>3</sup> denoted PBE-DCACP, and by the dispersion correction according to Grimme,<sup>4</sup> denoted PBE-D. All calculations were carried out for the  $\Gamma$  point. After optimization, the maximum nuclear gradient was  $2.6 \times 10^{-3}$  Hartree/bohr for the tc structure and  $5 \times 10^{-4}$  Hartree/bohr for the mc structure. To obtain sc, hex and bcc model structure we constructed unit cells containing one PCBM molecule and optimized the geometry to  $5 \times 10^{-4}$  Hartree/bohr for a series of lattice constants until an energy minimum was obtained. These optimizations were carried out for the PBE-DCACP functional only. The fcc-C<sub>60</sub> structure was obtained similarly using 4 PCBM molecules per unit cell. The cohesive energy per fullerene molecule,  $E_c$ , was calculated as  $E_c = (E_{\text{pbc}} - nE_g)/n$  where  $E_{\text{pbc}}$  is the total potential energy per unit cell in periodic boundary conditions (pbc),  $E_g$  is the potential energy of a fullerene molecule in the gas phase using the gas phase optimized structure and  $n$  is the number of fullerene molecules per unit cell. In case of tc- and mc-PCBM the solvent molecules were deleted before  $E_{\text{pbc}}$  was calculated.

Electronic coupling matrix elements,  $H_{ab}$ , were calculated using the fragment orbital density functional theory (FODFT) approach of Ref. 5 in combination with the electronic structure method detailed above,

$$H_{ab} = \langle \phi_D^{N+1} | h_b^{\text{KS}} | \phi_A^{N+1} \rangle, \quad (1)$$

where  $N$  is the number of electrons of neutral PCBM,  $h_b^{\text{KS}}$  is the one-particle Kohn-Sham Hamiltonian constructed from the  $2N + 1$  orbitals of the isolated electron donor molecule PCBM<sup>-</sup> and the isolated electron acceptor molecule PCBM (A),  $\phi_D^{N+1}$  is the SOMO orbital of the negatively charged donor molecule PCBM<sup>-</sup>, and  $\phi_A^{N+1}$  the SOMO orbital of the negatively charged acceptor molecule PCBM<sup>-</sup>. In order to preserve the Hermitian property, the final coupling matrix element was obtained as the average of  $H_{ab}$  and  $H_{ba}$ . For a discussion of the approximations underlying Eq. 1 we refer here to our recent work.<sup>5,6</sup>

The reorganization energy  $\lambda$  was assumed to equal the sum of an inner-sphere contribution,  $\lambda_i$ , and an outer-sphere contribution  $\lambda_o$ ,  $\lambda = \lambda_i + \lambda_o$ . The inner-sphere contribution was obtained according to the standard 4-point scheme,

$$\lambda_i = [E_C(\mathbf{R}_N) + E_N(\mathbf{R}_C)] - [E_C(\mathbf{R}_C) + E_N(\mathbf{R}_N)] \quad (2)$$

where  $\mathbf{R}_C$  and  $\mathbf{R}_N$  denote the geometry at the minimum of the potential energy surface of the negatively charged PCBM<sup>-</sup> (C) and neutral PCBM (N), and  $E_C$  and  $E_N$  are the potential energies of N and C, respectively. The outer-sphere contribution was estimated using the Marcus formula<sup>7</sup>

$$\lambda_o = (\Delta q)^2 (1/\epsilon_{\text{op}} - 1/\epsilon_s) (1/r - 1/R), \quad (3)$$

where  $\epsilon_s$  and  $\epsilon_{\text{opt}}$  are the static and optical dielectric constants,  $r$  the cavity radius for C and  $R$  the center-to-center distance between two fullerenes. We use the experimental parameters for fcc-C<sub>60</sub>,  $\epsilon_s = 4.4$ ,<sup>8,9</sup>  $\epsilon_{\text{op}} = n^2 = 4.0$  (at  $1.06 \text{ \mu m}$ ),<sup>10,11</sup>  $r = 5.02 \text{ \AA}$ .

## 2 Frontier orbitals of C<sub>60</sub> and PCBM

The lowest unoccupied orbital (LUMO) of C<sub>60</sub> is of  $t_{1u}$  symmetry and 3-fold degenerate.<sup>17</sup> **Vertical** insertion of an excess electron leaves the symmetry of the orbitals unchanged, resulting in a 3-fold degenerate **singly**

**occupied molecular orbital (SOMO) for unrelaxed  $C_{60}^-$ .** An electronic state of this manifold is depicted in Figure S1 (A). **After ionic relaxation of the anion the three levels become quasi-degenerate.** For  $PCBM^-$ , the 3-fold degeneracy is lifted due to the presence of the side chain. The SOMO of  $PCBM^-$  still resembles very closely the SOMO of  $C_{60}^-$  with the nodal plane oriented parallel with respect to the side chain (see Figure S1 (B)). The SOMO+1 and the SOMO+2 are 40 and 240 meV, respectively, above the SOMO. The nodal plane of these states include the side chain as shown in Figure S1 (C), (D). The energetic order of the orbitals is the same for the six different side chain conformations found in the tc (four) and mc (two) crystal structure, hence the orbital energies were averaged over all six structures. The energy spacing between SOMO and SOMO+1 of  $PCBM^-$  is not more than  $1 - 2k_B T$  at room temperature, which means that the two orbitals are in fact quasi-degenerate and that both of them contribute to electron transfer. The SOMO+2 is too high in energy to contribute significantly at ambient temperature. Thus, the number of orbitals mediating electron transfer reduces from three for  $C_{60}^-$  to two for  $PCBM^-$ . The coupling matrix elements presented in the main text are for the SOMO of  $PCBM^-$ , only, which suffices to show that hopping models are not applicable.

## References

- [1] Rispen, M. T.; Meetsma, A.; Rittberger, R.; Brabec, C. J.; Sariciftci, N. S.; Hummelen, J. C. *Chem. Commun.* **2003**, page 2116.
- [2] Perdew, J. P.; Burke, K.; Ernzerhof, M. *Phys. Rev. Lett.* **1996**, *77*, 3865.
- [3] Lin, I. C.; von Lilienfeld, O. A.; Couthinho-Neto, M. D.; Tavernelli, I.; Rothlisberger, U. *J. Phys. Chem. B* **2007**, *111*, 14346.
- [4] Grimme, S. *J. Comp. Chem.* **2006**, *27*, 1787.
- [5] Oberhofer, H.; Blumberger, J. *Phys. Chem. Chem. Phys.* **2012**, *14*, 13846.
- [6] Oberhofer, H.; Blumberger, J. *J. Chem. Phys.* **2010**, *133*, 244105.
- [7] Marcus, R. A. *J. Chem. Phys.* **1956**, *24*, 966.
- [8] Hebard, A. F.; Haddon, R. C.; Fleming, R. M.; Kortan, A. R. *Appl. Phys. Lett.* **1991**, *59*, 2109.
- [9] Fartash, A. *Phys. Rev. B* **1996**, *54*, 17215.
- [10] Meth, J. S.; Vanherzeele, H.; Wang, Y. *Chem. Phys. Lett.* **1992**, *197*, 26.
- [11] Kafafi, Z.; Lindle, J.; Pong, R.; Bartoli, F.; Lingg, L.; Milliken, J. *Chem. Phys. Lett.* **1992**, *188*, 492.
- [12] Brunschwig, B. S.; Logan, J.; Newton, M. D.; Sutin, N. *J. Am. Chem. Soc.* **1980**, *102*, 5798.
- [13] Newton, M. D.; Sutin, N. *Ann. Rev. Phys. Chem.* **1984**, *35*, 437.
- [14] Heiney, P. A. *J. Phys. Chem. Solids* **1992**, *53*, 1333.
- [15] Napoles-Duarte, J. M.; Reyes-Reyes, M.; Ricardo-Chavez, J. L.; Garibay-Alonso, R.; Lopez-Sandoval, R. *Phys. Rev. B* **2008**, *78*, 035425.
- [16] Pan, C.; Sampson, M. P.; Chai, Y.; Hauge, R. H.; Margrave, J. L. *J. Phys. Chem.* **1991**, *95*, 2944.
- [17] Dresselhaus, M. S.; Dresselhaus, G.; Rao, A. M.; Eklund, P. C. *Synthetic Metals* **1996**, *78*, 313.
- [18] Coropceanu, V.; Cornil, J.; da Silva, D. A.; Olivier, Y.; Silbey, R.; Bredas, J.-L. *Chem. Rev.* **2007**, *107*, 926.

- [19] MacKenzie, R. C. I.; Frost, J. M.; Nelson, J. *J. Chem. Phys.* **2010**, *132*, 064904.
- [20] Cheung, D. L.; Troisi, A. *J. Phys. Chem. C* **2010**, *114*, 20479.
- [21] Troisi, A. *Chem. Soc. Rev.* **2011**, *40*, 2347.
- [22] Kwiatkowski, J. J.; Frost, J. M.; Nelson, J. *Nano Lett.* **2009**, *9*, 1085.
- [23] David, W. I. F.; Ibberson, R. M.; Matthewman, J. C.; Prassides, K.; Dennis, J. S.; Hare, J. P.; Kroto, H. W.; Taylor, R.; Walton, D. R. M. *Nature* **1991**, *353*, 147.
- [24] Hedberg, K.; Hedberg, L.; Bethune, D. S.; Brown, C. A.; Dorn, H. C.; Johnson, R. D.; de Vries, M. *Science* **1991**, *254*, 410.

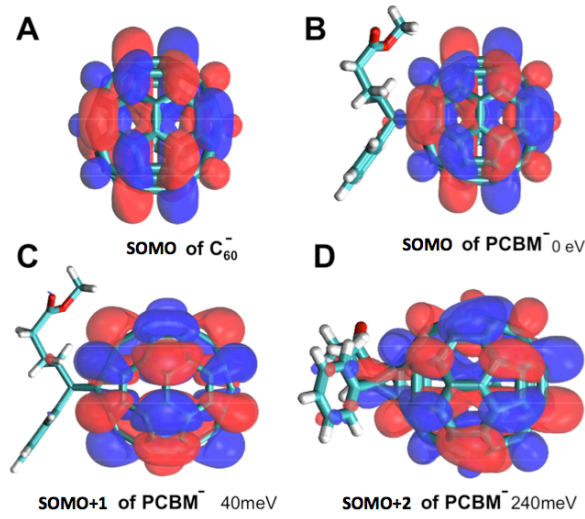

Figure S1: Singly occupied molecular orbital (SOMO) for gas phase  $C_{60}^-$  (A) and  $PCBM^-$  (B), SOMO+1 of  $PCBM^-$  (C) and SOMO+2 of  $PCBM^-$  (D). Energy levels indicated for PCBM are averaged over different side chain conformations.

Table S1: Bond lengths of the long and short covalent bond,  $d_l$  and  $d_s$ , respectively, lattice constant  $a$  and cohesive energy  $E_c$  of PCBM and  $C_{60}$  (calc = calculated, exp = experimental, lit = literature). All calculations were carried out with the PBE-DCACP functional if not stated otherwise.

|                            | $d_l$ (Å) |                    | $d_s$ (Å) |                    | $a$ (Å)            |                      | $E_c$ (eV) |       |                    |
|----------------------------|-----------|--------------------|-----------|--------------------|--------------------|----------------------|------------|-------|--------------------|
|                            | calc      | exp                | calc      | exp                | calc               | lit                  | PBE-DCACP  | PBE-D | lit                |
| <b>PCBM</b>                |           |                    |           |                    |                    |                      |            |       |                    |
| tc                         | 1.454     | 1.447 <sup>a</sup> | 1.399     | 1.388 <sup>a</sup> | -                  | 13.757 <sup>ab</sup> | -1.41      | -1.91 | -                  |
| mc                         | 1.451     | 1.447 <sup>a</sup> | 1.399     | 1.388 <sup>a</sup> | -                  | 13.833 <sup>ac</sup> | -1.30      | -1.76 | -                  |
| sc                         | 1.453     | -                  | 1.399     | -                  | 10.25              | 9.9 <sup>e</sup>     | -1.09      | -1.07 | -1.27 <sup>e</sup> |
| hex                        | 1.453     | -                  | 1.399     | -                  | 10.00 <sup>d</sup> | 9.7 <sup>e</sup>     | -0.97      | -0.79 | -1.05 <sup>e</sup> |
| bcc                        | 1.453     | -                  | 1.399     | -                  | 13.06              | 11.1 <sup>e</sup>    | -0.87      | -0.73 | -0.95 <sup>e</sup> |
| gas                        | 1.454     | -                  | 1.399     | -                  | -                  | -                    | -          | -     | -                  |
| <b><math>C_{60}</math></b> |           |                    |           |                    |                    |                      |            |       |                    |
| fcc                        | 1.452     | 1.455 <sup>f</sup> | 1.398     | 1.391 <sup>f</sup> | 14.25              | 14.15 <sup>g</sup>   | 1.37       | 1.48  | 1.789 <sup>h</sup> |
| gas                        | 1.453     | 1.458 <sup>i</sup> | 1.399     | 1.401 <sup>i</sup> | -                  | -                    | -          | -     | -                  |

<sup>a</sup>Ref.<sup>1</sup>

<sup>b</sup> $b = 16.634\text{Å}$ ,  $c = 19.077\text{Å}$ ,  $\beta = 105.29^\circ$ .

<sup>c</sup> $b = 15.288\text{Å}$ ,  $c = 19.249\text{Å}$ ,  $\alpha = 80.26^\circ$ ,  $\beta = 78.56^\circ$ ,  $\gamma = 80.41^\circ$ .

<sup>d</sup> $c = 12.00\text{Å}$ .

<sup>e</sup>Ref.,<sup>15</sup> LDA.

<sup>f</sup>Ref.,<sup>23</sup> at 5 K, sc-structure.

<sup>g</sup>Ref.,<sup>14</sup> at 255 K.

<sup>h</sup>Ref.<sup>16</sup>

<sup>i</sup>Ref.,<sup>24</sup> at 730° C.

Table S2: Electron transfer parameter for hexagonal, sc and bcc PCBM in the respective minimum energy structures.

| ET direction        | $R$ (Å) | $H_{ab}$ (meV) | $\lambda$ (meV) | $\Delta E_{ad}^\ddagger$ (meV) | $k_{ET}$ (Hz)         |
|---------------------|---------|----------------|-----------------|--------------------------------|-----------------------|
| sc                  |         |                |                 |                                |                       |
| [010]               | 10.25   | 32.7           | 139             | 9                              | $9.23 \times 10^{12}$ |
| [001]               | 10.25   | 6.1            | 139             | 29                             | $5.05 \times 10^{11}$ |
| [100]               | 10.25   | 2.3            | 139             | 33                             | $6.71 \times 10^{10}$ |
| $[\bar{1}0\bar{1}]$ | 14.50   | 0.5            | 148             | 37                             | $2.65 \times 10^9$    |
| $[0\bar{1}1]$       | 14.50   | 0.5            | 148             | 37                             | $2.65 \times 10^9$    |
| [110]               | 14.50   | 0.2            | 148             | 37                             | $4.19 \times 10^8$    |
| [101]               | 14.50   | 0.1            | 148             | 37                             | $1.04 \times 10^8$    |
| [011]               | 14.50   | 0.0            | 148             | 37                             | $< 1.04 \times 10^8$  |
| $[\bar{1}10]$       | 14.50   | 0.0            | 148             | 37                             | $< 1.04 \times 10^8$  |
| hex                 |         |                |                 |                                |                       |
| [100]               | 10.00   | 73.9           | 138             | -7                             | $1.97 \times 10^{13}$ |
| [010]               | 10.00   | 6.4            | 138             | 28                             | $5.63 \times 10^{11}$ |
| [110]               | 10.00   | 4.7            | 138             | 30                             | $2.98 \times 10^{11}$ |
| [001]               | 12.00   | 2.9            | 143             | 33                             | $1.02 \times 10^{11}$ |
| bcc                 |         |                |                 |                                |                       |
| [111]               | 11.31   | 1.2            | 142             | 34                             | $1.70 \times 10^{10}$ |
| [001]               | 13.06   | 0.8            | 146             | 36                             | $7.01 \times 10^9$    |
| $[\bar{1}\bar{1}1]$ | 11.31   | 0.6            | 142             | 35                             | $4.16 \times 10^9$    |
| [010]               | 13.06   | 0.4            | 146             | 36                             | $1.74 \times 10^9$    |
| $[11\bar{1}]$       | 11.31   | 0.3            | 142             | 35                             | $1.03 \times 10^9$    |
| $[\bar{1}\bar{1}1]$ | 11.31   | 0.1            | 142             | 35                             | $1.13 \times 10^8$    |
| [100]               | 13.06   | 0.1            | 146             | 36                             | $1.08 \times 10^8$    |
